# Supplementary material for: Identification of a large intronic transposal insertion in SLC17A5 causing sialic acid storage disease
Source: Springer Nature journal article supplement (doi:10.1186/s13023-017-0584-6), 2017-02-10
Supplement: MOESM1 [file 12058982]

## SUPPLEMENTARY DATA

### Predicted cDNA sequences resulting from the LINE-1 L1-HS retrotransposon insertion

The insertion of a 6 kb LINE-1 L1-HS retrotransposon in intron 9 of *SLC17A5* is predicted to create a further two splice sites within this insertion, in addition to the splice site at the exon-intron boundary. The resulting cDNA sequences for these three predicted transcripts are provided below. Untranslated sequences are indicated in grey, translated sequences are indicated in black and stop codons are indicated in red. The location of the primers used in the cDNA analyses is underlined.

### *SLC17A5* cDNA sequence – Splice site 1 (at the exon-intron boundary)

-----5' UTR-----  
GGCTCACTTTGCGCCAATCCTACGAGAACTCCCAGAACTCCGCTTCCCTAGTCCAACCCAAGCCAGAGTTGCCACACCTAAGATG  
GCGGCGGGGGCGGAGTCGGCGCGGCCCTCTGGGCGGGACCGCGGGGACTAGACGTGGCCGCGGGGCGGTGTCATCGCCCC  
CGCCCCCGCCGGTCCAGCCAGCTCGGCCCGGGGCTTCGGGCTGTCGGGCCGGCGCTCCCTTCTGCCAGGTGGCGAGTACACC  
TGCTCACGTAGGCGTC

-----Exon 1-----  
ATG AGG TCT CCG GTT CGA GAC CTG GCC CGG AAC GAT GGC GAG GAG AGC ACG GAC CGC ACG CCT CTT CTA CCG  
GGC GCC CCA CGG GCC GAA GCC G

-----Exon 2-----  
CT CCA GTG TGC TGC TCT GCT CGT TAC AAC TTA GCA ATT TTG GCC TTT TTT GGT TTC TTC ATT GTG TAT GCA TTA CGT  
GTG AAT CTG AGT GTT GCG TTA GTG GAT ATG GTA GAT TCA AAT ACA ACT TTA GAA GAT AAT AGA ACT TCC AAG GCG  
TGT CCA GAG CAT TCT GCT CCC ATA AAA GTT CAT CAT AAT CAA ACG

-----Exon 3-----  
GGT AAG AAG TAC CAA TGG GAT GCA GAA ACT CAA GGA TGG ATT CTC GGT TCC TTT TTT TAT GGC TAC ATC ATC ACA  
CAG ATT CCT GGA GGA TAT GTT GCC AGC AAA ATA GGG GGG AAA ATG CTG CTA GGA TTT GGG ATC CTT GGC ACT GCT  
GTC CTC ACC CTG TTC ACT CCC ATT GCT GCA GAT TTA GGA GTT GGA CCA CTC ATT GTA CTC AGA GCA CTA GAA GGA  
CTA GGA GAG

-----Exon 4-----  
GGT GTT ACA TTT CCA GCC ATG CAT GCC ATG TGG TCT TCT TGG GCT CCC CCT CTT GAA AGA AGC AAA CTT CTT AGC  
ATT TCA TAT GCA G

-----Exon 5-----  
GA GCA CAG CTT GGG ACA GTA ATT TCT CTT CCT CTT TCT GGA ATA ATT TGC TAC TAT ATG AAT TGG ACT TAT GTC TTC  
TAC TTT TTT G

-----Exon 6-----  
GT ACT ATT GGA ATA TTT TGG TTT CTT TTG TGG ATC TGG TTA GTT AGT GAC ACA CCA CAA AAA CAC AAG AGA ATT TCC  
CAT TAT GAA AAG GAA TAC ATT CTT TCA TCA TTA AGA AAT CAG

-----Exon 7-----  
CTT TCT TCA CAG AAG TCA GTG CCG TGG GTA CCC ATT TTA AAA TCC CTG CCA CTT TGG GCT ATC GTA GTT GCA CAC  
TTT TCT TAC AAC TGG ACT TTT TAT ACT TTA TTG ACA TTA TTG CCT ACT TAT ATG AAG GAG ATC CTA AGG TTC AAT GTT  
CAA GAG

-----Exon 8-----  
AAT GGG TTT TTA TCT TCA TTG CCT TAT TTA GGC TCT TGG TTA TGT ATG ATC CTG TCT GGT CAA GCT GCT GAC AAT TTA  
AGG GCA AAA TGG AAT TTT TCA ACT TTA TGT GTT CGC AGA ATT TTT AGC CTT ATA G

-----Exon 9-----  
GA ATG ATT GGA CCT GCA GTA TTC CTG GTA GCT GCT GGC TTC ATT GGC TGT GAT TAT TCT TTG GCC GTT GCT TTC CTA  
ACT ATA TCA ACA ACA CTG GGA GGC TTT TGC TCT TCT GGA TTT AGC ATC AAC CAT CTG GAT ATT GCT CCT TC

-----Exon 10-----

G TAT GCT GGT ATC CTC CTG GGC ATC ACA AAT ACA TTT GCC ACT ATT CCA GGA ATG GTT GGG CCC GTC ATT GCT AAA  
AGT CTG ACC CCT GAT

-----Exon 11-----

AAC ACT GTT GGA GAA TGG CAA ACC GTG TTC TAT ATT GCT GCT GCT ATT AAT GTT TTT GGT GCC ATT TTC TTT ACA  
CTA TTC GCC AAA GGT GAA GTA CAA AAC TGG GCT CTC AAT GAT CAC CAT GGA CAC AGA CAC **TGA**

-----3' UTR-----

AGGAACCAATAAATAATCCTGCCTCTATTAATGTATTTTTATTTATCATGTAACCTCAAAGTGCCTTCTGTATTGTGTAAGCATTCTA  
TGCTTTTTTTAATTGTACTTGTATTAGATTTTTAAGGCCTATAATCATGAAATATCACTAGTTGCCAGAATAATAAAATGAACTGTG  
TTAATTATGAATAATATGTAAGCTAGGACTTCTACTTTAGGTTCCACATACCTGCCTGCTAGTCGGGCAACATGAAGTAGGACAGT  
TCTGTTGATTTTTAGGGCCATACTAAAGGGAATGAGCTGAAACAGACCTCTGATACCTTTGCTTAATTAACCTAGATGATAATTC  
TCAGGTAAGTATAAACACCTGTTGTTTCACTTTCTCATAAAAAATGTCAGCTCTCTGACACTTAGACCTCAAACCTTAGCATC  
TCTGTGGAGCTGCCATCCACTGTATAATTTGCCTGGCAACTGGACTGAGGGGAGTGTGCCAGGCAGCTGCCAAGCACTCCCTC  
CCTGGCTCAGGGTCAGAGTGCCAGCGTTTATCAGAGGCAGCATCCAAGCCAGAGCCAGTGTGACTCTTCGGCTGGTGCCTT  
TCCTCTGAGGGGCTATCAATGTGTAGATAAAGCCCTGAGTAGGCAAGAGCAGTGAGATCCACTGCTATGGTCTTGATACATCCTC  
AAACTTTCCCTCCAGCAGAGGAATATTGGCTGGCATGCAACCTGCAAAGAAAAATGCGAAGCGGGCCGGGCACGGTGGCT  
CATGCCTGTAATCCAGCACTTTGGGGGGCTGAGGTGGGCGAATCATGAGATCAGGAGTTCGAGACCAGCCTGGCCAGCATGGT  
GAAACCCCATCTCTACTAAAAATACAAAAATAGCTGGGCGTGGTACGGGCGCCTGTAATCCAGATACTCAGGAGGCTGAGG  
TAGGAGAATCACTTGAACCTGGGAGGTGGAAGTTGAGTGAACCAAGATCACGCCACTGCACTCCAGCCTGGGCGATGGAGCGA  
GACTCCAACCTAAAAAAGAAATAAAGAAAGAAAAGTGCAGTCCCAAGTCAATCACAATAAGATCATCTGGTTTAAAT  
CTACTCTACATGGATCACAGTATAAATTTCTATGTGCTGTGTTTTGTTCTGTTTGTATTTTGTAGAGATGGGGTCTCGTTTTGTCGCC  
CAGGCTGGTTTTGAACTCCTGGCTCAAGCGATCCTCTGTCTCGGCCACAAAGTGTGAGACTACAGGCATGAGCCACTGTGC  
CCAGCCTGTTCTATGTTTTAAGCTACACGAGAATTTTTTTTTTAATTAATTCTCACTGTTTGTTCAGTCTGTCTTCTAAGTTTGT  
GTTGCAGTTTAAAGTTAAAGTACTTTTTAAAGGCCACATCACCTGAGACTAGGGTAATCATCTTACTTCTGGTTCCTGAAATCATA  
TTTTCCAGTGGACCATCCTCAGTGGCTGTGTTGTTGAGCATGCTTTCAGAACACCTATGTGGCTTAAAACCTAGTTTATGTTTT  
GTGTTCAACACTACGTGTAATATTTTAAACTGTTAATGTGATGTGAATACATTTATGTACATTTATTTTAAATTTGTAATAGCT  
TTAAATTGCTATGGCAATGTTTCTTTTATAAATCATCAAATAAACCTTTGTGAATTGA

The predicted amplicon size for the exon 9-11 cDNA PCR for this transcript is 517 bp

**SLC17A5 cDNA sequence – Splice site 2 (82 bp into the insertion sequence)**

-----5' UTR-----

GGCTCACTTTGCGCAATCCTACGAGAAGTCCAGAACTCCGCTTCCCTAGTCCAACCAAGCCAGAGTTGCCACACCTAAGATG  
GCGGCGGGGGCGAGTCGGCGGGCCGCTCTGGGCGGGACCGCGGGGACTAGACGTGGCCGCGGGGCGGTGCATCGCCCC  
CGCCCCGCCCGTCCAGCCAGCTCGGCCCGGGGCTTCGGGCTGTCCGGCCGCGCTCCCTTCTCTGCCAGGTGGCGAGTACACC  
TGCTCACGTAGGCGTC

-----Exon 1-----

ATG AGG TCT CCG GTT CGA GAC CTG GCC CGG AAC GAT GGC GAG GAG AGC ACG GAC CGC ACG CCT CTT CTA CCG  
GGC GCC CCA CGG GCC GAA GCC G

-----Exon 2-----

CT CCA GTG TGC TGC TCT GCT CGT TAC AAC TTA GCA ATT TTG GCC TTT TTT GGT TTC TTC ATT GTG TAT GCA TTA CGT  
GTG AAT CTG AGT GTT GCG TTA GTG GAT ATG GTA GAT TCA AAT ACA ACT TTA GAA GAT AAT AGA ACT TCC AAG GCG  
TGT CCA GAG CAT TCT GCT CCC ATA AAA GTT CAT CAT AAT CAA ACG

-----Exon 3-----

GGT AAG AAG TAC CAA TGG GAT GCA GAA ACT CAA GGA TGG ATT CTC GGT TCC TTT TTT TAT GGC TAC ATC ATC ACA  
CAG ATT CCT GGA GGA TAT GTT GCC AGC AAA ATA GGG GGG AAA ATG CTG CTA GGA TTT GGG ATC CTT GGC ACT GCT  
GTC CTC ACC CTG TTC ACT CCC ATT GCT GCA GAT TTA GGA GTT GGA CCA CTC ATT GTA CTC AGA GCA CTA GAA GGA  
CTA GGA GAG

-----Exon 4-----

GGT GTT ACA TTT CCA GCC ATG CAT GCC ATG TGG TCT TCT TGG GCT CCC CCT CTT GAA AGA AGC AAA CTT CTT AGC  
ATT TCA TAT GCA G

-----Exon 5-----  
GA GCA CAG CTT GGG ACA GTA ATT TCT CTT CCT CTT TCT GGA ATA ATT TGC TAC TAT ATG AAT TGG ACT TAT GTC TTC  
TAC TTT TTT G

-----Exon 6-----  
GT ACT ATT GGA ATA TTT TGG TTT CTT TTG TGG ATC TGG TTA GTT AGT GAC ACA CCA CAA AAA CAC AAG AGA ATT TCC  
CAT TAT GAA AAG GAA TAC ATT CTT TCA TCA TTA AGA AAT CAG

-----Exon 7-----  
CTT TCT TCA CAG AAG TCA GTG CCG TGG GTA CCC ATT TTA AAA TCC CTG CCA CTT TGG GCT ATC GTA GTT GCA CAC  
TTT TCT TAC AAC TGG ACT TTT TAT ACT TTA TTG ACA TTA TTG CCT ACT TAT ATG AAG GAG ATC CTA AGG TTC AAT GTT  
CAA GAG

-----Exon 8-----  
AAT GGG TTT TTA TCT TCA TTG CCT TAT TTA GGC TCT TGG TTA TGT ATG ATC CTG TCT GGT CAA GCT GCT GAC AAT TTA  
AGG GCA AAA TGG AAT TTT TCA ACT TTA TGT GTT CGC AGA ATT TTT AGC CTT ATA G

-----Exon 9-----  
GA ATG ATT GGA CCT GCA GTA TTC CTG GTA GCT GCT GGC TTC ATT GGC TGT GAT TAT TCT TTG GCC GTT GCT TTC CTA  
ACT ATA TCA ACA ACA CTG GGA GGC TTT TGC TCT TCT GGA TTT AGC ATC AAC CAT CTG GAT ATT GCT CCT TC

-----Intron 9-----  
G **TGA** gtactaataataagatttgc

-----Insertion-----  
atggccgaataggaacagctccggtctacagctcccagcgtgagcgcagcagaagacgggtatttctgatttccatctgag

-----Exon 10-----  
GTATGCTGGTATCCTCCTGGGCATCACAAATACATTTGCCACTATCCAGGAATGGTTGGGCCCGTCATTGCTAAAAGTCTGACCC  
CTGAT

-----Exon 11-----  
AACACTGTTGGAGAATGGCAAACCGTGTCTATATTGCTGCTGCTATTAATGTTTTGGTGCCATTTCTTTACACTATTCGCCAAA  
GGTGAAGTACAAAACCTGGGCTCTCAATGATCACCATGGACACAGACTGA

-----3' UTR-----  
AGGAACCAATAAATAATCTGCCTCTATTAATGTATTTTTATTTATCATGTAACCTCAAAGTGCCTTCTGTATTGTGTAAGCATTCTA  
TGCTTTTTTTAATTGTACTTGTATTAGATTTTTAAGGCCATAATCATGAAATATCACTAGTTGCCAGAATAATAAAATGAACTGTG  
TTAATTATGAATAATATGTAAGCTAGGACTTCTACTTTAGGTTACATACTGCCTGCTAGTCGGGCAACATGAAGTAGGACAGT  
TCTGTTGATTTTTAGGGCCATACTAAAGGGAATGAGCTGAAACAGACCTCCTGATACCTTTGCTTAATTAACACTAGATGATAATTC  
TCAGGTACTGATAAACACCTGTTGTTGTTCACTTTCTCATAAAAATGTCAGCTCTCTGACACTTAGACCTCAAACCTTAGCATC  
TCTGTGGAGCTGCCATCCACTGTATAATTTGCCTGGCAACTGGACTGAGGGGAGTGTGCCCAGGCAGCTGCCAAGCACTCCCTC  
CCTGGCTCAGGGTCAAGTGTCCAGCGTTATCAGAGGCAGCATCCAAGCCAGAGCCAGTGTGACTCTTCGGCTGGTGCCTT  
TCCTCTGAGGGGCTATCAATGTGTAGATAAAGCCCTGAGTAGGCAAGAGCAGTGAGATCCACTGCTATGGTCTTGATACATCCTC  
AACTTTCCCTCCAGCACAGAGGAATATTGGCTGGCATGCAACCTGCAAAAGAAAAATGCGAAGCGGCCGGGCACGGTGGCT  
CATGCCGTGAATCCCAGCACTTTGGGGGGCTGAGGTGGGCGAATCATGAGATCAGGAGTTGAGACCCCTGGCCAGCATGGT  
GAAACCCATCTCTACTAAAAATACAAAAAATTAGCTGGGCGTGGTACGGGGCCTGTAATCCAGATACTCAGGAGGCTGAGG  
TAGGAGAATCACTTGAACCTGGGAGGTGGAAGTTGAGTGAACCAAGATCACGCCACTGCACTCCAGCCTGGGCGATGGAGCGA  
GACTCCAACCAAAAAAAAAAAGAATAAAGAAAGAAAAGTGCATGCCAGTCAATCACAATAAGATCATCCTGGTTTAAAT  
CTACTCTCATGATCAGTATAAATTTCTATGTGCTGTGTTTTGTTGTTTTGTAGAGATGGGGTCTCGTTTTGTGCGCC  
CAGGCTGGTTTTGAACTCCTGGCTCAAGCGATCCTCCTGTCTCGGCCATCACAAAGTGTGAGACTACAGGCATGAGCCACTGTG  
CCAGCCTGTTCTATGTTTTAAGCTACACGAGAATTTTTTTTTTAATTAATCTCACTGTTTGTTCAGTCTGTCTTCATCTAAGTTGT  
GTTGCAGTTTTAAAGTAAAGTACTTTTTAAAGGCCACATCACCTGAGACTAGGGTAATCATCTTTACTTCTGGTTCCTGAAATCATA  
TTTTCCAGTGGACCCTCCAGTGGCTGTGGTTGTTGAGCATGCTTTCAGAACACCTATGTGGCTTAAACCTAGTTTATGTTTT  
GTGTTCAACACTACGTGAATATTTTTAAACTGTTAATGTGATGTAATACATTTATGTACATTTATTTTTAAATTTGTAATAGCT  
TTAAATTGCTATGGCAATGTTCTTTTATAAATCATCAAATAAACCTTTGTGAATTGA

The predicted amplicon size for the exon 9-11 cDNA PCR for this transcript is 623 bp

## SLC17A5 cDNA sequence – Splice site 3 (679 bp into the insertion sequence)

### 5' UTR

GGCTCACTTTGCGCAATCCTACGAGAACTCCCAGAACTCCGCTTCCCTAGTCCAACCCAAGCCAGAGTTGCCACACCTAAGATG  
GCGGCGGGGGCGGAGTCGGCGCGGGCCCTCTGGGCGGGACCGCGGGGACTAGACGTGGCCGCGGGGCGGTGTCATCGCCCC  
CGCCCCGCCCGTCCAGCCAGCTCGGCCCGGGGCTTCGGGCTGTCGGGCGCGGCTCCCTTCTGCCAGGTGGCGAGTACACC  
TGCTCACGTAGGCGTC

### Exon 1

ATG AGG TCT CCG GTT CGA GAC CTG GCC CGG AAC GAT GGC GAG GAG AGC ACG GAC CGC ACG CCT CTT CTA CCG  
GGC GCC CCA CGG GCC GAA GCC G

### Exon 2

CT CCA GTG TGC TGC TCT GCT CGT TAC AAC TTA GCA ATT TTG GCC TTT TTT GGT TTC TTC ATT GTG TAT GCA TTA CGT  
GTG AAT CTG AGT GTT GCG TTA GTG GAT ATG GTA GAT TCA AAT ACA ACT TTA GAA GAT AAT AGA ACT TCC AAG GCG  
TGT CCA GAG CAT TCT GCT CCC ATA AAA GTT CAT CAT AAT CAA ACG

### Exon 3

GGT AAG AAG TAC CAA TGG GAT GCA GAA ACT CAA GGA TGG ATT CTC GGT TCC TTT TTT TAT GGC TAC ATC ATC ACA  
CAG ATT CCT GGA GGA TAT GTT GCC AGC AAA ATA GGG GGG AAA ATG CTG CTA GGA TTT GGG ATC CTT GGC ACT GCT  
GTC CTC ACC CTG TTC ACT CCC ATT GCT GCA GAT TTA GGA GTT GGA CCA CTC ATT GTA CTC AGA GCA CTA GAA GGA  
CTA GGA GAG

### Exon 4

GGT GTT ACA TTT CCA GCC ATG CAT GCC ATG TGG TCT TCT TGG GCT CCC CCT CTT GAA AGA AGC AAA CTT CTT AGC  
ATT TCA TAT GCA G

### Exon 5

GA GCA CAG CTT GGG ACA GTA ATT TCT CTT CCT CTT TCT GGA ATA ATT TGC TAC TAT ATG AAT TGG ACT TAT GTC TTC  
TAC TTT TTT G

### Exon 6

GT ACT ATT GGA ATA TTT TGG TTT CTT TTG TGG ATC TGG TTA GTT AGT GAC ACA CCA CAA AAA CAC AAG AGA ATT TCC  
CAT TAT GAA AAG GAA TAC ATT CTT TCA TCA TTA AGA AAT CAG

### Exon 7

CTT TCT TCA CAG AAG TCA GTG CCG TGG GTA CCC ATT TTA AAA TCC CTG CCA CTT TGG GCT ATC GTA GTT GCA CAC  
TTT TCT TAC AAC TGG ACT TTT TAT ACT TTA TTG ACA TTA TTG CCT ACT TAT ATG AAG GAG ATC CTA AGG TTC AAT GTT  
CAA GAG

### Exon 8

AAT GGG TTT TTA TCT TCA TTG CCT TAT TTA GGC TCT TGG TTA TGT ATG ATC CTG TCT GGT CAA GCT GCT GAC AAT TTA  
AGG GCA AAA TGG AAT TTT TCA ACT TTA TGT GTT CGC AGA ATT TTT AGC CTT ATA G

### Exon 9

GA ATG ATT GGA CCT GCA GTA TTC CTG GTA GCT GCT GGC TTC ATT GGC TGT GAT TAT TCT TTG GCC GTT GCT TTC CTA  
ACT ATA TCA ACA ACA CTG GGA GGC TTT TGC TCT TCT GGA TTT AGC ATC AAC CAT CTG GAT ATT GCT CCT TC

### Intron 9

G **TGA** gtactaatataaagatttgc

### Insertion

atggccgaataggaacagctccggtctacagctcccagcgtgagcagcagaagacgggtgatttctgatttccatctgaggtaccgggttcatctcactagggagtgcc  
agacagtgggcgcagccagtggtgtgtgctgcaccgtgctgcagcgaagcagggcgaggcattgcctcacctgggaagcgaaggggtcagggagttccctttctgagt  
caaagaaaggggtgacggtcgcacctggaaaatcgggtcactcccaccgaatattgcgcttttcagaccgcttaagaaacggcgcaccacgagactatcccacac  
tggctcggagggctcctacgccacggaatctcgctgattgctagcacagcagctgagatcaaaactgcaaggcggcaacgaggtctggggagggcgcccgcattgcc  
caggcttcttaggtaaaacaaagcagccgggaagctcgaactgggtggagcccaccacagctcaaggaggcctgcctctgtaggctccacctctggggcagggc  
acagacaaacaaaagacagcagtaacctctgcagactaagtgtccctgtctgacagcttgaagagagcagtggttctcccagcagcagctggagatctgagaacg  
ggcagacagactgcctctca

### Exon 10

GTATGCTGGTATCCTCCTGGGCATCACAATAACATTTGCCACTATCCAGGAATGGTTGGGCCCGTCATTGCTAAAAGTCTGACCC  
CTGAT

-----Exon 11-----

AACACTGTTGGAGAATGGCAAACCGTGTCTATATTGCTGCTGCTATTAATGTTTTGGTGCCATTTTCTTTACACTATTCGCCAAA  
GGTGAAGTACAAAACCTGGGCTCTCAATGATCACCATGGACACAGACACTGA

-----3' UTR-----

AGGAACCAATAAATAATCCTGCCTCTATTAATGTATTTTTATTTATCATGTAACCTCAAAGTGCCTTCTGTATTGTGTAAGCATTCTA  
TGTCTTTTTTAATTGTACTTGTATTAGATTTTTAAGGCCTATAATCATGAAATATCACTAGTTGCCAGAATAATAAAATGAACTGTG  
TTAATTATGAATAATATGTAAGCTAGGACTTCTACTTTAGGTTACACATACCTGCCTGCTAGTCGGGCAACATGAAGTAGGACAGT  
TCTGTTGATTTTTAGGGCCATACTAAAGGGAATGAGCTGAAACAGACCTCCTGATACCTTTGCTTAATTAACCTAGATGATAATTC  
TCAGGTACTGATAAACACCTGTTGTTTTCACTTTCCTCATAAAAAATTGTCAGCTCTCTCTGACACTTAGACCTCAAACCTTAGCATC  
TCTGTGGAGCTGCCATCCACTGTATAATTTGCCTGGCAACTGGACTGAGGGGAGTGTGCCCAGGCAGCTGCCAAGCACTCCCTC  
CCTGGCTTCAGGGTCAGAGTGCCAGCGTTTATCAGAGGCAGCATCCAAGCCCAGAGCCAGTGTGACTCTTCGGCTGGTGCCTT  
TCCTCTGAGGGGTATCAATGTGTAGATAAAGCCCTGAGTAGGCAAGAGCAGTGAGATCCACTGCTATGGTCTTGATACATCCTC  
AAACTTTCCCTCCAGCACAGAGGAATATTGGCTGGCATGCAACCTGCAAAAGAAAAATGCGAAGCGGCCGGGCACGGTGGCT  
CATGCCTGTAATCCCAGCACTTTGGGGGGCTGAGGTGGGCGAATCATGAGATCAGGAGTTCGAGACCAGCCTGGCCAGCATGGT  
GAAACCCCATCTCTACTAAAAATACAAAAATTAGCTGGGCGTGGTGACGGGCGCCTGTAATCCCAGATACTCAGGAGGCTGAGG  
TAGGAGAATCACTTGAACCTGGGAGGTGGAAGTTCAGTGAACCAAGATCACGCCACTGCACTCCAGCCTGGGCGATGGAGCGA  
GACTCCAACCTAAAAAAGAAATAAAGAAAGAAAAGTGCAGTGCCAGTCAATCACAAATAAGATCATCCTGGTTTAAAT  
CTACTCTACATGGATCACAGTATAAATTTCTATGTGCTGTGTTTTGTTTCGTTTGTATTTGTAGAGATGGGGTCTCGTTTTGTCGCC  
CAGGCTGGTTTTGAACTCCTGGCTCAAGCGATCCTCTGTCTCGGCCCTACAAAAGTGTGAGACTACAGGCATGAGCCACTGTGC  
CCAGCCTGTTCTATGTTTTAAGCTACACGAGAATTTTTTTTTAATTAATTCTCACTGTTTGTTCAGTCTGTCTTCATCTAAGTTTGT  
GTTGCAGTTTAAAGTTAAAGTGACTTTTTAAAGGCCACATCACCTGAGACTAGGGTAATCATCTTACTTCTGGTTCCTGAAATCATA  
TTTTCCAGTGGACCATCTCCAGTGGCTGTGTTGTTGAGCATGCTTTCAGAACACCTATGTGGCTTAAACCTAGTTTATGTTTT  
GTGTTCAACACTACGTGAATATTTTAAACCTGTTAATGTGATGTGAATACATTTATGTACATTTATTTTTAAATTTGTAATAGCT  
TTAAATTGCTATGGCAATGTTTCTTTTATAAATCATCAAATAAACCTTTGTGAATTGA

The predicted amplicon size for the exon 9-11 cDNA PCR for this transcript is 1220 bp
